# Supplementary material for: Second generation DNA methylation age predicts cognitive change in midlife: the moderating role of childhood socioeconomic status
Source: publisher site journal article supplement (doi:10.18632/aging.206284), 2025-07-23
Supplement: Supplementary file [file aging-v17-206284-supplementary-material-SD1.pdf]

SUPPLEMENTARY FIGURES

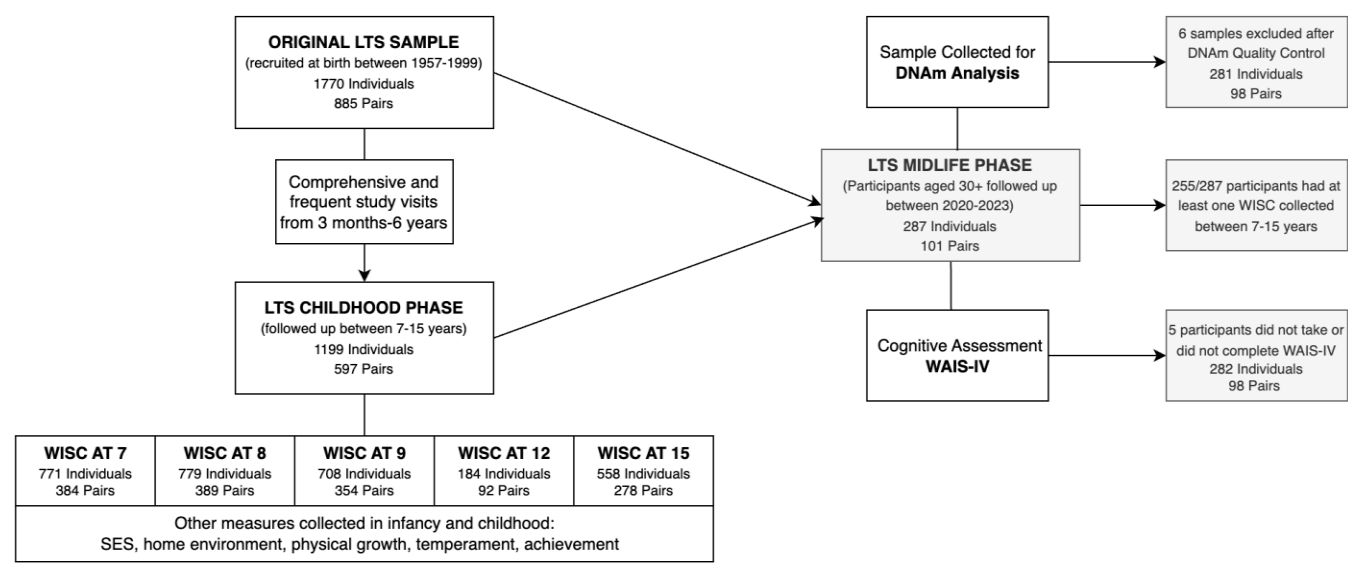

Supplementary Figure 1. Participant flow diagram from the Louisville Twin Study.

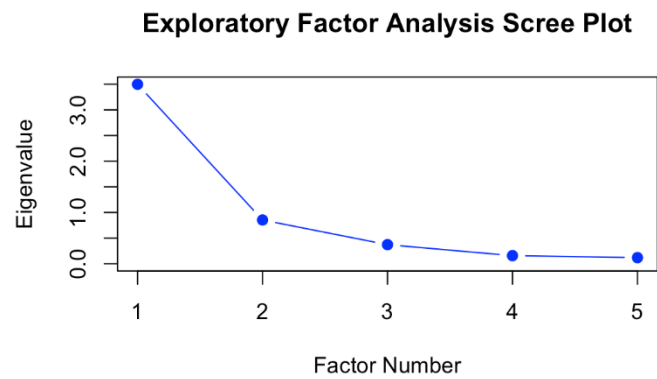

Supplementary Figure 2. Scree plot of eigenvalues.

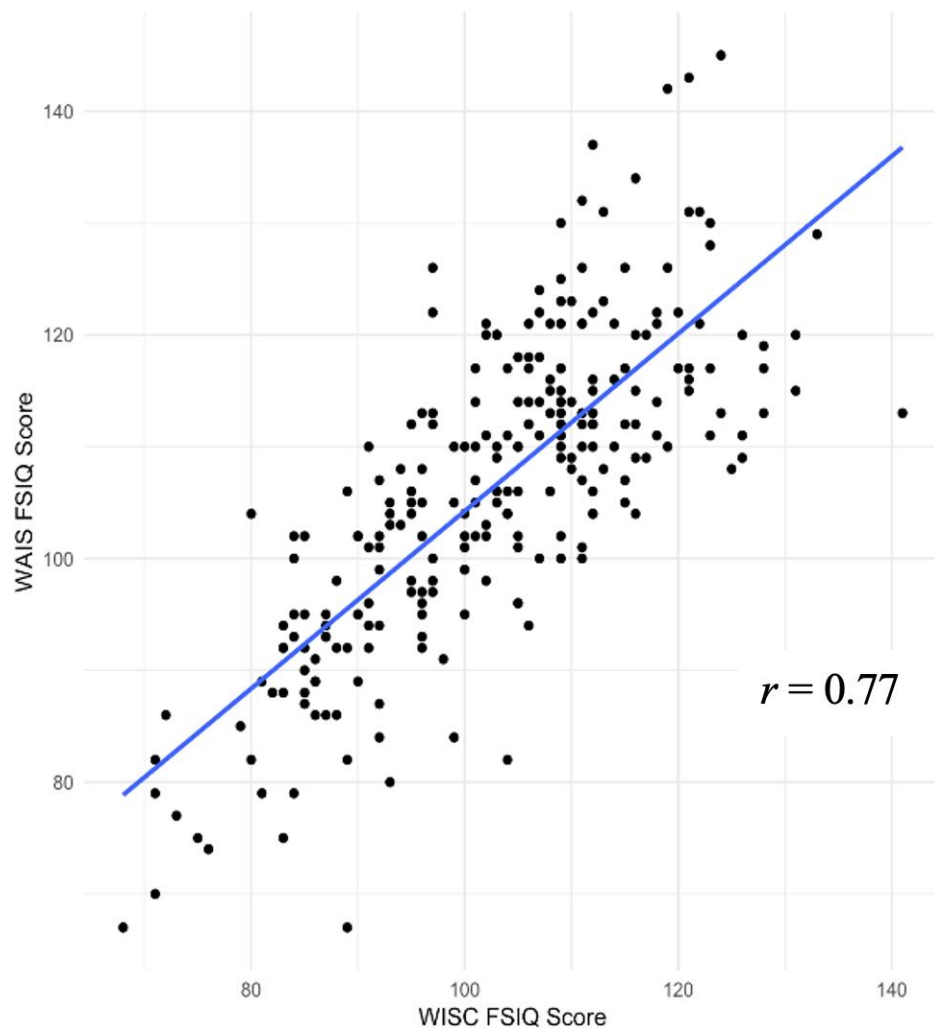

**Supplementary Figure 3. Relationship between childhood and adult IQ scores.**
